# Supplementary material
Source: publisher site journal article supplement (https://www.dovepress.com/article/419880)
Supplement: Supplementary file 1 [file get_supplementary_file.php]

**Supplemental Table 1** The first 20 genes obtained by 11 approaches

| Betweenness | Stress | Radiality | MNC | MCC | EPC | EcCentricity | DMNC | Degree | Closeness | BottleNeck |
| --- | --- | --- | --- | --- | --- | --- | --- | --- | --- | --- |
| ARG1 | ARG1 | CXCL10 | DDX58 | DDX58 | DDX58 | DDX58 | DHX58 | CXCL10 | CXCL10 | CAMP |
| CAMP | CAMP | DDX58 | DDX60 | DDX60 | DDX60 | DDX60 | EIF2AK2 | DDX58 | DDX58 | CXCL10 |
| CMPK2 | CXCL10 | DDX60 | HERC5 | GBP1 | HERC5 | EIF2AK2 | GBP1 | DDX60 | DDX60 | DDX58 |
| CXCL10 | DDX58 | HERC5 | IFI35 | HERC5 | IFI35 | EPSTI1 | HERC5 | HERC5 | HERC5 | DDX60 |
| DDX58 | DDX60 | IFI35 | *IFI44* | *IFI44* | *IFI44* | HERC5 | HERC6 | IFI35 | IFI35 | EIF2AK2 |
| DDX60 | *IFI44* | *IFI44* | *IFI44*L | *IFI44*L | *IFI44*L | HERC6 | IFI27 | *IFI44* | *IFI44* | HERC5 |
| *IFI44* | *IFI44*L | *IFI44*L | IFIH1 | IFIH1 | IFI6 | *IFI44* | *IFI44* | *IFI44*L | *IFI44*L | HERC6 |
| *IFI44*L | IFIH1 | IFIH1 | IFIT1 | IFIT1 | IFIH1 | *IFI44*L | IFI6 | IFIH1 | IFIH1 | IFI35 |
| IFIH1 | IFIT1 | IFIT1 | IFIT2 | IFIT2 | IFIT1 | IFIH1 | IFIT2 | IFIT1 | IFIT1 | *IFI44* |
| IFIT1 | IFIT3 | IFIT2 | IFIT3 | IFIT3 | IFIT2 | IFIT1 | IFIT5 | IFIT2 | IFIT2 | IFIH1 |
| IFIT3 | ISG15 | IFIT3 | ISG15 | ISG15 | IFIT3 | IFIT2 | IFITM1 | IFIT3 | IFIT3 | LCN2 |
| LCN2 | LCN2 | ISG15 | MX1 | MX1 | ISG15 | IFIT3 | IFITM3 | ISG15 | ISG15 | MX1 |
| MX1 | MX1 | MX1 | MX2 | MX2 | MX1 | IFIT5 | ISG15 | MX1 | MX1 | OAS1 |
| MX2 | MX2 | MX2 | OAS1 | OAS1 | MX2 | IFITM3 | OAS2 | MX2 | MX2 | PLSCR1 |
| OAS1 | OAS2 | OAS1 | OAS2 | OAS2 | OAS2 | ISG15 | OAS3 | OAS1 | OAS1 | RSAD2 |
| OAS3 | OAS3 | OAS2 | OAS3 | OAS3 | OAS3 | MX1 | OASL | OAS2 | OAS2 | RTP4 |
| PLSCR1 | OASL | OAS3 | OASL | OASL | OASL | MX2 | PARP9 | OAS3 | OAS3 | SAMD9L |
| RSAD2 | RSAD2 | OASL | RSAD2 | RSAD2 | RSAD2 | OASL | RSAD2 | OASL | OASL | SPATS2L |
| RTP4 | RTP4 | RSAD2 | RTP4 | RTP4 | RTP4 | RSAD2 | TRIM22 | RSAD2 | RSAD2 | TCN1 |
| SPATS2L | SPATS2L | RTP4 | XAF1 | XAF1 | SAMD9L | RTP4 | XAF1 | RTP4 | RTP4 | XAF1 |

**Abbreviations:** MNC, Maximum Neighborhood Component; MCC, Maximum Clique Centrality; EPC, Edge-Percolated Component; DMNC, Density of Maximum Neighborhood Component; Degree, Degree of Node Connection; Closeness, Closeness node connection closeness.
